# Supplementary material for: Strong NH⋯S hydrogen bonds in molybdoenzyme models containing anilide moieties
Source: Royal Society of Chemistry journal article supplement (doi:10.1039/c3dt50139f), 2013-01-01
Supplement: c3dt50139f.pdf [file c3dt50139f.pdf]

## **Supplementary Information:**

### **Strong NH...S hydrogen bonds in molybdoenzyme models containing anilide moieties**

Taka-aki Okamura,\* Kumiko Kunisue, Yui Omi and Kiyotaka Onitsuka

Department of Macromolecular Science, Graduate School of Science, Osaka University, Toyonaka,  
Osaka 560-0043, Japan

E-mail: tokamura@chem.sci.osaka-u.ac.jp

### X-ray analysis

Single crystal of *N*-phenyl-2,3-bis(pivaloylthio)benzamide was selected carefully and mounted in a loop with Nujol, which was frozen immediately in a stream of cold nitrogen at 200 K. Data collection was made on a Rigaku RAXIS-RAPID Imaging Plate diffractometer with graphite monochromated Mo-K $\alpha$  radiation (0.71075 Å). The structures were solved by SIR92<sup>1</sup> and expanded by Fourier technique using SHELXL-97.<sup>2</sup> All non-hydrogen atoms were refined anisotropically. All hydrogen atoms were placed at the calculated positions using the riding model.

### References

1. A. Altomare, M. C. Burla, M. Camalli, M. Cascarano, C. Giacovazzo, A. Guagliardi and G. Polidori, *J. Appl. Crystallogr.*, 1994, **27**, 435.
2. G. M. Sheldrick, *Acta Cryst.*, 2008, **A64**, 112-122.

**Table S1** Crystallographic data for 2,3-(*t*-BuCOS)<sub>2</sub>C<sub>6</sub>H<sub>3</sub>CONHPh

|                                                                                                                  | 2,3-( <i>t</i> -BuCOS) <sub>2</sub> C <sub>6</sub> H <sub>3</sub> CONHPh |
|------------------------------------------------------------------------------------------------------------------|--------------------------------------------------------------------------|
| empirical formula                                                                                                | C <sub>23</sub> H <sub>27</sub> NO <sub>3</sub> S <sub>2</sub>           |
| formula weight                                                                                                   | 429.58                                                                   |
| color                                                                                                            | colorless                                                                |
| crystal system                                                                                                   | monoclinic                                                               |
| <i>a</i> , Å                                                                                                     | 14.012(5)                                                                |
| <i>b</i> , Å                                                                                                     | 11.196(3)                                                                |
| <i>c</i> , Å                                                                                                     | 17.900(5)                                                                |
| $\beta$ , deg                                                                                                    | 123.857(13)                                                              |
| <i>V</i> , Å <sup>3</sup>                                                                                        | 2332(1)                                                                  |
| space group                                                                                                      | <i>P</i> 2 <sub>1</sub> / <i>c</i>                                       |
| <i>Z</i>                                                                                                         | 4                                                                        |
| <i>D</i> <sub>calc</sub> , g/cm <sup>3</sup>                                                                     | 1.224                                                                    |
| <i>F</i> (000)                                                                                                   | 912                                                                      |
| $\mu$ (MoK $\alpha$ ), mm <sup>-1</sup>                                                                          | 0.251                                                                    |
| Scan type                                                                                                        | $\omega$                                                                 |
| 2 $\theta$ <sub>max</sub> , deg                                                                                  | 55                                                                       |
| No. of Reflections unique                                                                                        | 5334                                                                     |
| No. Variables                                                                                                    | 266                                                                      |
| <i>R</i> 1 <sup><i>a</i></sup> ( <i>I</i> > 2 $\sigma$ ( <i>I</i> )), <i>wR</i> 2 <sup><i>b</i></sup> (all data) | 0.0424, 0.1108                                                           |
| GOF                                                                                                              | 1.037                                                                    |
| CCDC number                                                                                                      | 917686                                                                   |

$${}^a R1 = \frac{\sum ||F_o| - |F_c||}{\sum |F_o|}. \quad {}^b wR2 = \left\{ \frac{\sum [w(F_o^2 - F_c^2)^2]}{\sum [w(F_o^2)]} \right\}^{1/2}$$

**Table S2** <sup>1</sup>H NMR chemical shifts for the anion parts of 1–4 in acetonitrile-*d*<sub>3</sub> at 30 °C

|              | 1    | 2    | difference | 3    | 4    | difference |
|--------------|------|------|------------|------|------|------------|
| 4-H          | 7.77 | 7.47 | 0.30       | 7.60 | 7.26 | 0.34       |
| 5-H          | 6.92 | 6.82 | 0.10       | 6.74 | 6.55 | 0.19       |
| 6-H          | 7.60 | 7.43 | 0.17       | 7.40 | 7.14 | 0.26       |
| NH           | 11.3 | 11.0 | 0.3        | 9.08 | 8.63 | 0.45       |
| <i>o</i> -H  | 7.85 | 7.18 | 0.67       | —    | —    | —          |
| <i>m</i> -H  | 7.41 | 7.18 | 0.23       | —    | —    | —          |
| <i>p</i> -H  | 7.13 | 6.96 | 0.17       | —    | —    | —          |
| <i>t</i> -Bu | —    | —    | —          | 1.45 | 1.16 | 0.29       |

**Table S3** Geometrical and electrostatic parameters of the optimized structures for *trans-1* and *cis-1*

|                         | <i>trans-1</i> | <i>cis-1</i> |          |
|-------------------------|----------------|--------------|----------|
| Mo=O, Å                 | 1.7002         | 1.7002       |          |
| bond index <sup>a</sup> | 1.9954         | 1.9946       |          |
| bond order <sup>b</sup> | 0.9056         | 0.9055       |          |
| Mo–S1(S3), Å            | 2.4329         | 2.4393       | 2.4378   |
| bond index              | 0.7203         | 0.7106       | 0.7163   |
| bond order              | 0.5656         | 0.5619       | 0.5637   |
| Mo–S2(S4), Å            | 2.4246         | 2.4190       | 2.4203   |
| bond index              | 0.8141         | 0.8234       | 0.8206   |
| bond order              | 0.5909         | 0.5944       | 0.5933   |
| S1–C1(S3–C3), Å         | 1.7853         | 1.7857       | 1.7857   |
| bond index              | 1.0866         | 1.0858       | 1.0846   |
| bond order              | 0.8449         | 0.8444       | 0.844    |
| S2–C2(S4–C4), Å         | 1.7833         | 1.7838       | 1.7832   |
| bond index              | 1.0761         | 1.0761       | 1.0772   |
| bond order              | 0.8427         | 0.8422       | 0.8431   |
| NH···S, Å               | 2.0507         | 2.0490       | 2.0605   |
| bond index              | 0.1114         | 0.1123       | 0.1082   |
| bond order              | 0.1498         | 0.1508       | 0.1459   |
| natural charge          |                |              |          |
| Mo                      | 0.65512        | 0.65359      |          |
| O                       | -0.53531       | -0.5357      |          |
| S1(S3)                  | -0.19381       | -0.20411     | -0.20435 |
| S2(S4)                  | -0.18424       | -0.17387     | -0.1742  |
| C1(C3)                  | -0.18436       | -0.15925     | -0.16002 |
| C2(C4)                  | -0.16052       | -0.18551     | -0.18556 |
| energy level/a.u.       |                |              |          |
| LUMO                    | 0.13486        | 0.13587      |          |
| HOMO                    | 0.02130        | 0.02212      |          |
| gap/a.u.                | 0.11356        | 0.11375      |          |
| kcal·mol <sup>-1</sup>  | 71.260         | 71.379       |          |
| total energy            |                |              |          |
| E(RB+HF-LYP)/a.u.       | -6904.232680   | -6904.231831 |          |
| difference/a.u.         | -0.000851      |              |          |
| kcal·mol <sup>-1</sup>  | -0.534         |              |          |

<sup>a</sup>Wiberg bond index. <sup>b</sup>Atom-atom overlap-weighted NAO bond order.

**Table S4** Geometrical and electrostatic parameters of the optimized structures for **2**

| <b>2</b>                |          |         |          |
|-------------------------|----------|---------|----------|
| O1–Mo–O2, deg           |          | 103.71  |          |
| Mo=O1(O2), Å            | 1.7315   |         | 1.7316   |
| bond index <sup>a</sup> | 1.7760   |         | 1.7754   |
| bond order <sup>b</sup> | 0.8134   |         | 0.8131   |
| Mo–S1(S3), Å            | 2.6912   |         | 2.6896   |
| bond index              | 0.4623   |         | 0.4641   |
| bond order              | 0.4051   |         | 0.4060   |
| Mo–S2(S4), Å            | 2.4579   |         | 2.4580   |
| bond index              | 0.8021   |         | 0.8024   |
| bond order              | 0.5574   |         | 0.5576   |
| difference Mo-S, Å      | 0.2333   |         | 0.2316   |
| S1–C1(S3–C3), Å         | 1.7530   |         | 1.7533   |
| bond index              | 1.1812   |         | 1.1803   |
| bond order              | 0.9112   |         | 0.9106   |
| S2–C2(S4–C4), Å         | 1.7742   |         | 1.7742   |
| bond index              | 1.0891   |         | 1.0892   |
| bond order              | 0.8491   |         | 0.8492   |
| NH...S, Å               | 2.0495   |         | 2.0514   |
| bond index              | 0.1178   |         | 0.1171   |
| bond order              | 0.1536   |         | 0.1528   |
| natural charge          |          |         |          |
| Mo                      |          | 1.15059 |          |
| O1(O2)                  | -0.56158 |         | -0.56170 |
| S1(S3)                  | -0.21082 |         | -0.21091 |
| S2(S4)                  | -0.11558 |         | -0.11558 |
| C1(C3)                  | -0.16229 |         | -0.16223 |
| C2(C4)                  | -0.19383 |         | -0.19376 |

<sup>a</sup>Wiberg bond index|. <sup>b</sup>Atom-atom overlap-weighted NAO bond order.

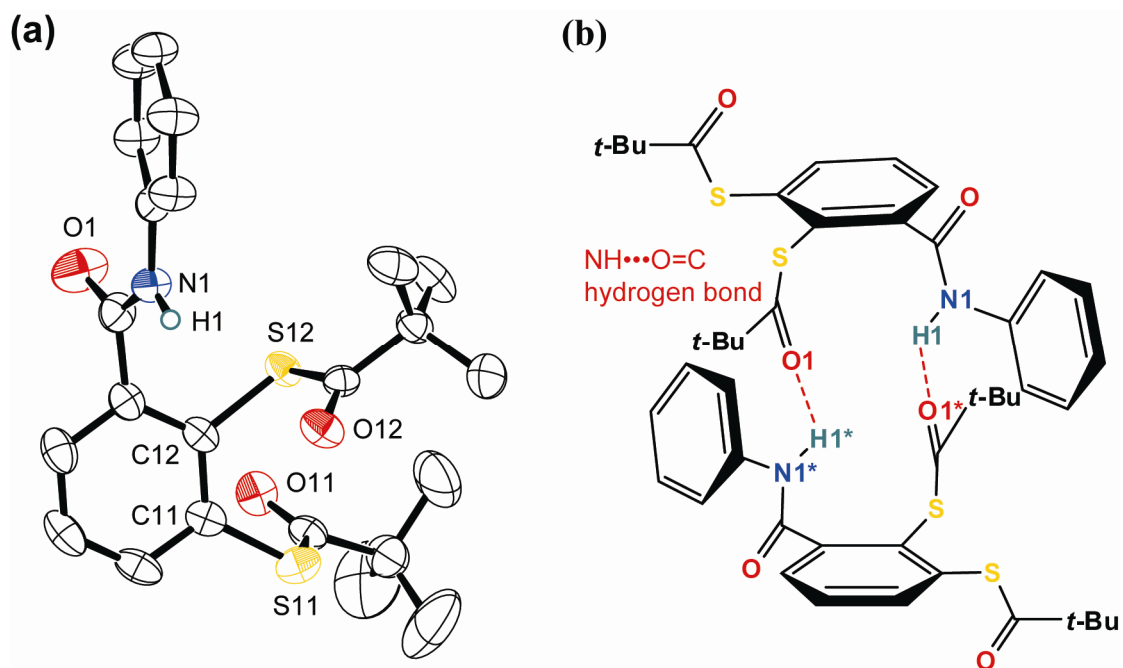

**Fig. S1** Molecular structure of 2,3-(*t*-BuCOS)<sub>2</sub>C<sub>6</sub>H<sub>3</sub>CONHPh (a) and illustration of intermolecular NH...O=C hydrogen bonds (b).

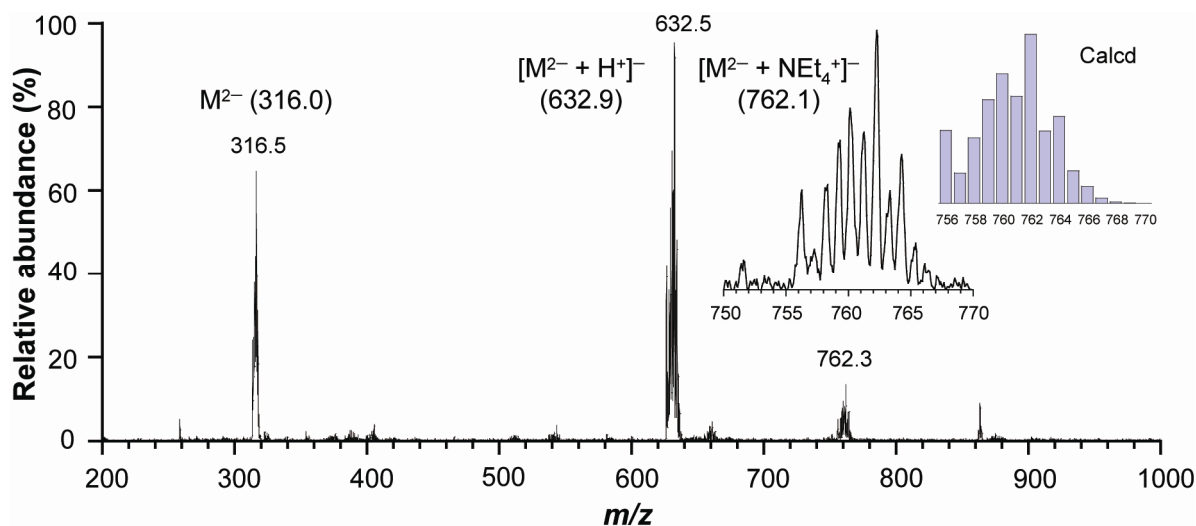

**Fig. S2** ESI-MS spectrum of (NEt<sub>4</sub>)<sub>2</sub>[Mo<sup>IV</sup>O(1,2-S<sub>2</sub>-3-PhNHCOC<sub>6</sub>H<sub>3</sub>)<sub>2</sub>] (**1**) in acetonitrile, where M<sup>2-</sup> = [MoO(1,2-S<sub>2</sub>-3-PhNHCOC<sub>6</sub>H<sub>3</sub>)<sub>2</sub>]<sup>2-</sup>. Calculated values are shown in the parentheses. The enlarged spectrum is the peak at *m/z* 762.3, accompanying simulated isotope pattern.

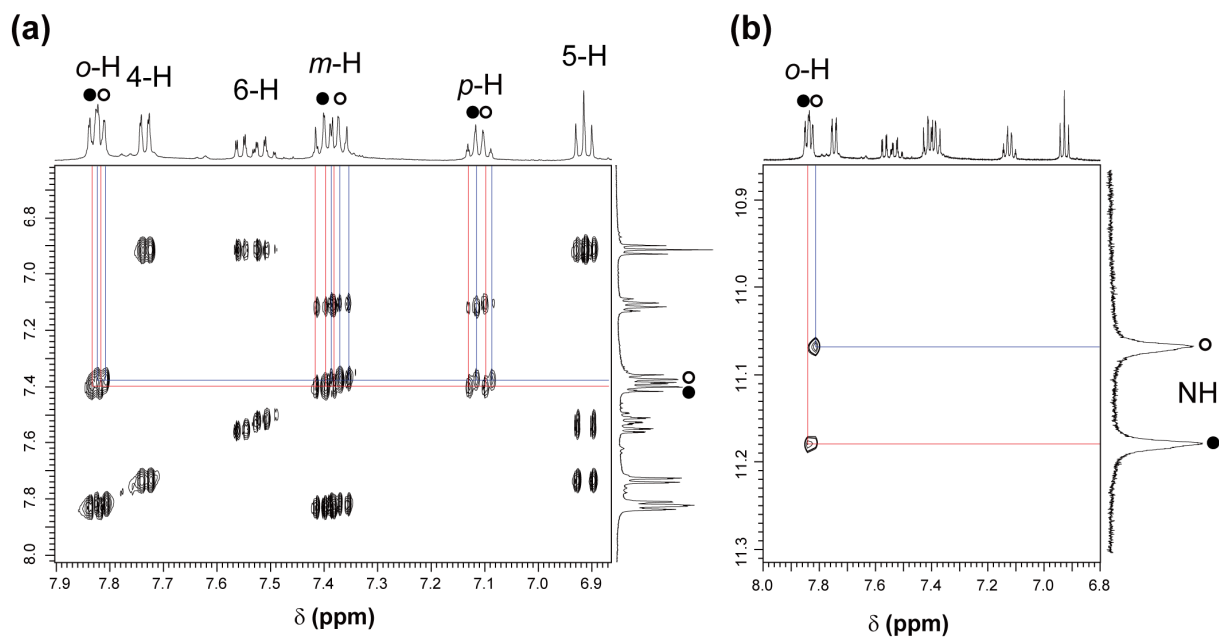

**Fig. S3** (a)  $^1\text{H}$ - $^1\text{H}$  gCOSY and (b) NOESY spectra of **1** in acetonitrile- $d_3$  at  $-30$  °C.

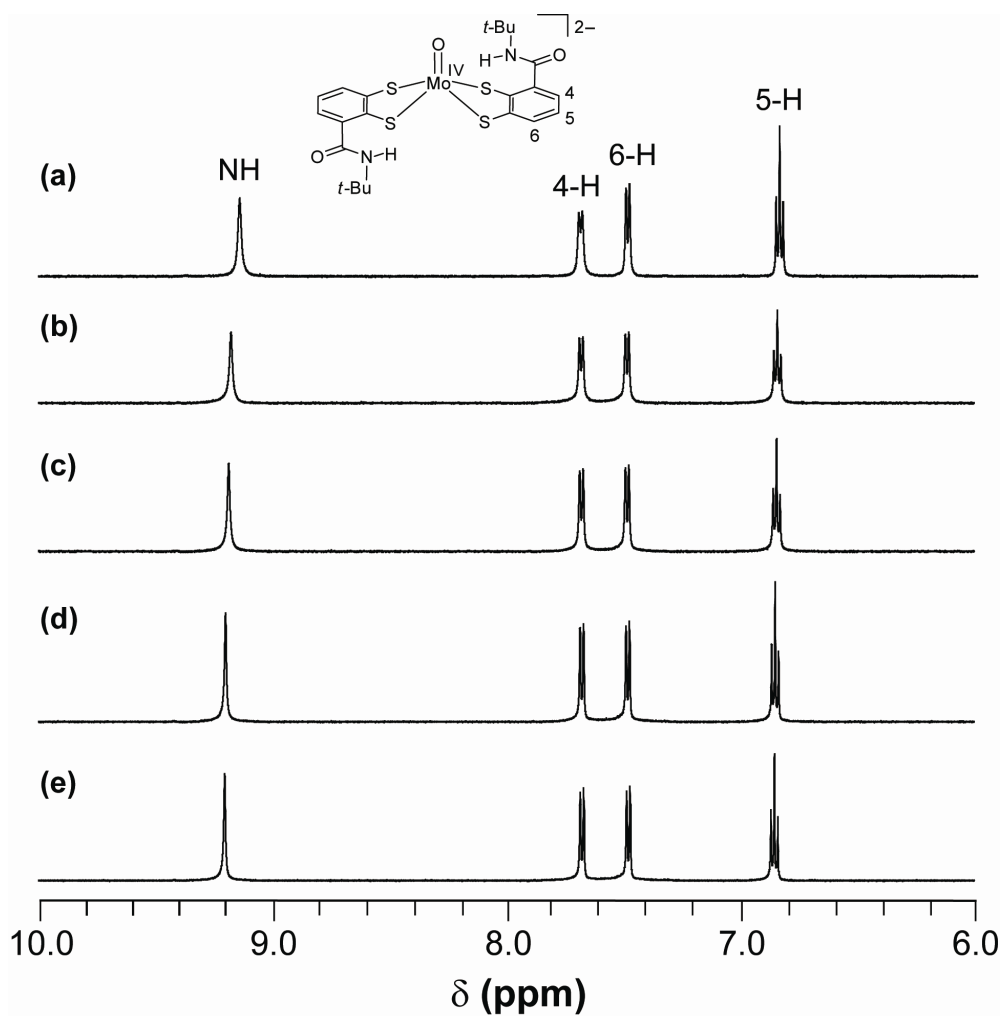

**Fig. S4**  $^1\text{H}$  NMR spectra of  $(\text{NEt}_4)_2[\text{Mo}^{\text{IV}}\text{O}(1,2\text{-S}_2\text{-3-}t\text{-BuNHCOC}_6\text{H}_3)_2]$  (*trans*-**3**) in acetonitrile- $d_3$  at (a) 30, (b) 0, (c)  $-10$ , (d)  $-30$ , and (e)  $-40$  °C.

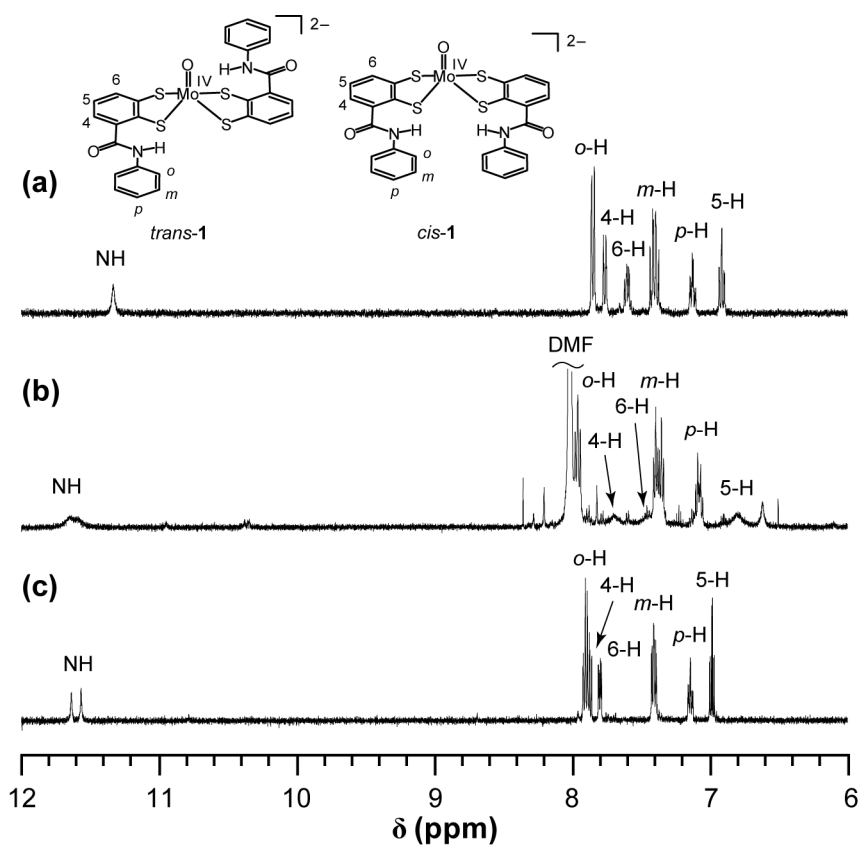

**Fig. S5**  $^1\text{H}$  NMR spectra of  $(\text{NEt}_4)_2[\text{Mo}^{\text{IV}}\text{O}(1,2\text{-S}_2\text{-3-PhNHCOC}_6\text{H}_3)_2]$  (**1**) in (a) acetonitrile- $d_3$ , (b) DMF- $d_7$ , and (c) dichloromethane- $d_2$  at  $30^\circ\text{C}$ .

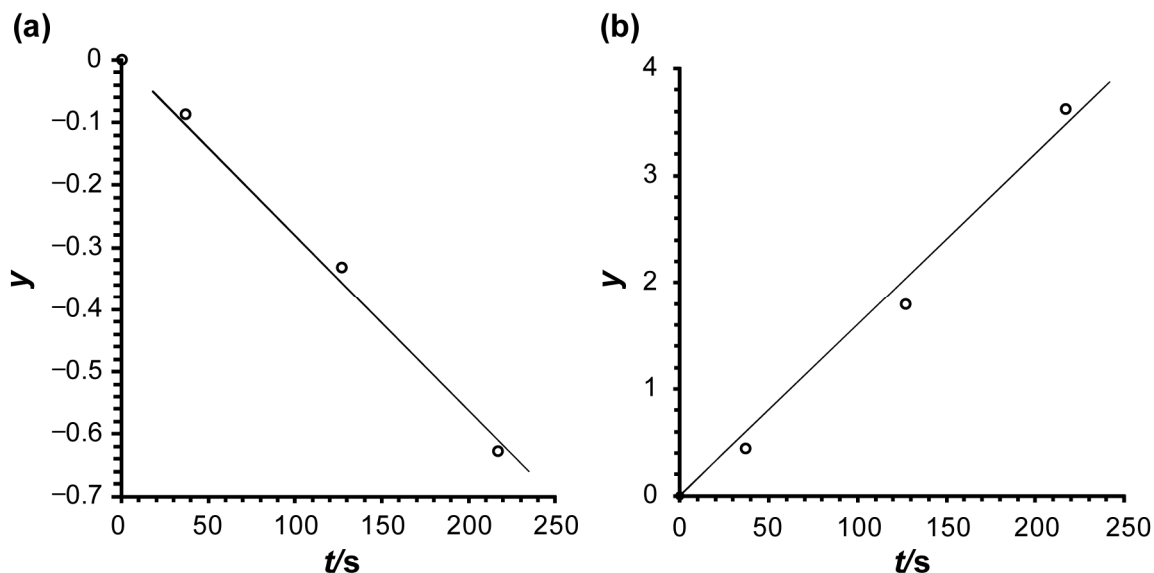

**Fig. S6** (a) Pseudo-first- and (b) second-order kinetics of the reaction between **1** and  $\text{Me}_3\text{NO}$  to **2** in DMF at  $27^\circ\text{C}$  ( $[\text{Mo}] = 1\text{ mM}$ ,  $[\text{Me}_3\text{NO}] = 2\text{ mM}$ ). The fitting lines are  $y = \ln(1 - [\text{Mo}^{\text{VI}}\text{O}_2]/[\text{Mo}^{\text{IV}}\text{O}]_0) = -k_{\text{obs}} \cdot t$ , where  $k_{\text{obs}}$  equals  $31 \times 10^{-4}\text{ s}^{-1}$  for (a) and  $y = 10^{-2} \cdot \{1/([\text{Mo}^{\text{IV}}\text{O}]_0 - [\text{Me}_3\text{NO}]_0)\} \cdot \ln\{([\text{Mo}^{\text{IV}}\text{O}][\text{Me}_3\text{NO}]_0)/([\text{Mo}^{\text{IV}}\text{O}]_0[\text{Me}_3\text{NO}])\} = 10^{-2} \cdot k_2 \cdot t$ , where  $k_2$  equals 2.12 for (b).

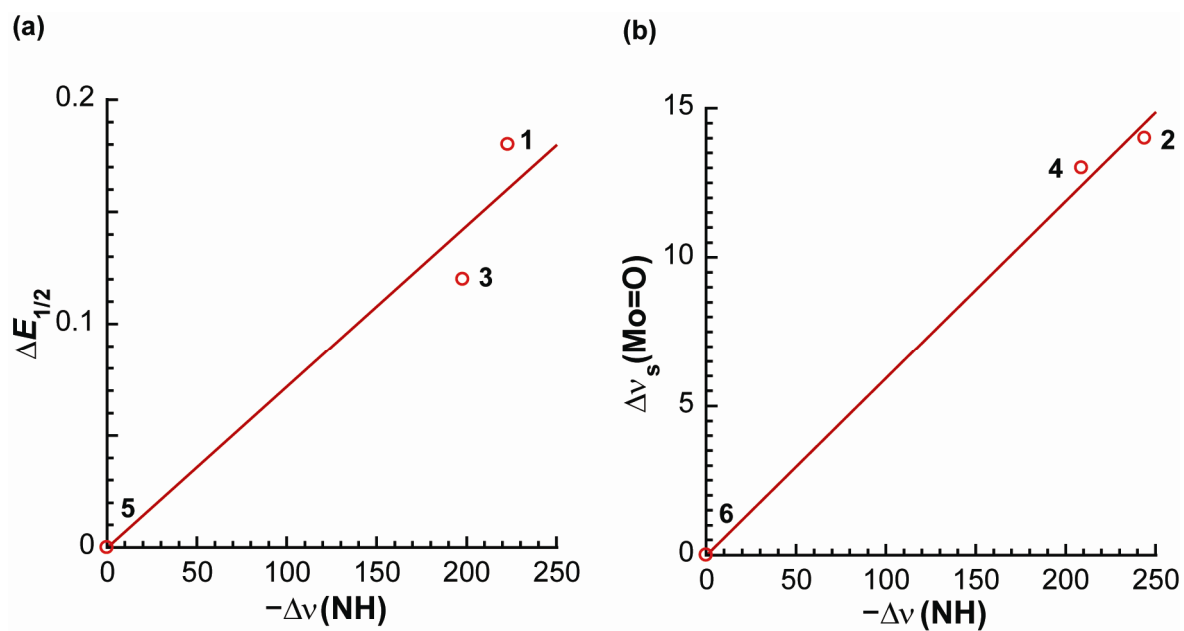

**Fig. S7** Correlation (a) between  $\Delta\nu(\text{NH})$  and  $\Delta E_{1/2}$  in the monooxomolybdenum(IV) complexes and (b) between  $\Delta\nu(\text{NH})$  and  $\Delta\nu_s(\text{Mo=O})$  in the dioxomolybdenum(VI) complexes. The original data are shown in Tables 1 and 2.
